# Supplementary material
Source: PubMed Central journal article supplement (PMC3783229)
Supplement: supp_mct164_mct164supp.pdf [file supp_mct164_mct164supp.pdf]

## SUPPLEMENTARY DATA

TABLE S1. Summary of wild *P. vulgaris* BRWN and BRN screening results. Average whorl and basal root number are based on the screening of five replicates per genotype.

| Genotype/ RIL | Average number of whorls | Average number of roots | Standard deviation for number of roots | Average seed weight (g) |
|---------------|--------------------------|-------------------------|----------------------------------------|-------------------------|
| PI318695      | 2.20                     | 8.80                    | 1.79                                   | 0.035                   |
| PI417680      | 2.00                     | 8.00                    | 0.00                                   | 0.125                   |
| PI430217      | 2.00                     | 8.00                    | 0.00                                   | 0.085                   |
| PI417692      | 2.00                     | 8.00                    | 0.00                                   | 0.110                   |
| PI346956      | 2.00                     | 8.00                    | 0.00                                   | 0.047                   |
| PI417695      | 2.00                     | 8.00                    | 0.00                                   | 0.128                   |
| PI417710      | 2.00                     | 8.00                    | 0.00                                   | 0.016                   |
| PI533383      | 2.00                     | 8.00                    | 0.00                                   | 0.091                   |
| PI535403      | 2.00                     | 8.00                    | 0.00                                   | 0.092                   |
| PI207431      | 2.00                     | 8.00                    | 0.00                                   | 0.070                   |
| PI273452      | 2.00                     | 8.00                    | 0.00                                   | 0.104                   |
| PI317349      | 2.00                     | 8.00                    | 0.00                                   | 0.051                   |
| PI318696      | 2.00                     | 8.00                    | 0.00                                   | 0.054                   |
| PI318698      | 2.00                     | 8.00                    | 0.00                                   | 0.041                   |
| PI318703      | 2.00                     | 8.00                    | 0.00                                   | 0.029                   |
| PI325677      | 2.00                     | 8.00                    | 0.00                                   | 0.033                   |
| PI325679      | 2.00                     | 8.00                    | 0.00                                   | 0.107                   |
| PI325683      | 2.00                     | 8.00                    | 0.00                                   | 0.052                   |
| PI325684      | 2.00                     | 8.00                    | 0.00                                   | 0.026                   |
| PI325696      | 2.00                     | 8.00                    | 0.00                                   | 0.033                   |
| PI325687      | 2.00                     | 8.00                    | 0.00                                   | 0.024                   |
| PI325690      | 2.00                     | 8.00                    | 0.00                                   | 0.043                   |

|          |      |      |      |       |
|----------|------|------|------|-------|
| PI326091 | 2.00 | 8.00 | 0.00 | 0.051 |
| PI346955 | 2.00 | 8.00 | 0.00 | 0.109 |
| PI346957 | 2.00 | 8.00 | 0.00 | 0.071 |
| PI390720 | 2.00 | 8.00 | 0.00 | 0.108 |
| PI417621 | 2.00 | 8.00 | 0.00 | 0.050 |
| PI417623 | 2.00 | 8.00 | 0.00 | 0.109 |
| PI417624 | 2.00 | 8.00 | 0.00 | 0.056 |
| PI417627 | 2.00 | 8.00 | 0.00 | 0.137 |
| PI417628 | 2.00 | 8.00 | 0.00 | 0.151 |
| PI318691 | 2.00 | 8.00 | 0.00 | 0.067 |
| PI325691 | 2.00 | 7.40 | 1.34 | 0.034 |
| PI317350 | 2.00 | 7.20 | 1.10 | 0.049 |
| PI417659 | 2.00 | 6.60 | 1.34 | 0.047 |
| PI417704 | 2.00 | 6.40 | 1.14 | 0.134 |
| PI417644 | 2.00 | 5.80 | 1.10 | 0.089 |
| PI329247 | 2.00 | 8.00 | 0.00 | 0.045 |
| PI417699 | 1.80 | 7.20 | 1.79 | 0.164 |
| PI318699 | 1.80 | 7.20 | 1.79 | 0.051 |
| PI325682 | 1.80 | 7.20 | 1.79 | 0.050 |
| PI417771 | 1.80 | 6.80 | 1.79 | 0.056 |
| PI318694 | 1.80 | 6.60 | 1.95 | 0.034 |
| PI318697 | 1.80 | 5.60 | 0.89 | 0.038 |
| PI318700 | 1.60 | 6.00 | 2.00 | 0.028 |
| PI417626 | 1.60 | 6.00 | 2.00 | 0.049 |
| PI325688 | 1.60 | 5.80 | 2.05 | 0.028 |
| PI417622 | 1.60 | 5.80 | 2.05 | 0.046 |
| PI417644 | 1.60 | 5.20 | 1.30 | 0.075 |

|          |      |      |      |       |
|----------|------|------|------|-------|
| PI325689 | 1.60 | 5.20 | 1.10 | 0.034 |
| PI325685 | 1.60 | 4.80 | 0.84 | 0.036 |
| PI417625 | 1.60 | 4.60 | 0.55 | 0.068 |
| PI318702 | 1.40 | 5.60 | 2.19 | 0.062 |
| PI325678 | 1.40 | 5.60 | 2.19 | 0.037 |
| PI325680 | 1.40 | 5.60 | 2.19 | 0.038 |
| PI417620 | 1.40 | 5.60 | 2.19 | 0.053 |
| PI325676 | 1.40 | 4.80 | 1.10 | 0.043 |
| PI417782 | 1.40 | 4.40 | 0.55 | 0.050 |
| PI318692 | 1.20 | 4.80 | 1.79 | 0.023 |
| PI343950 | 1.20 | 4.80 | 1.79 | 0.052 |
| PI325687 | 1.00 | 4.00 | 0.00 | 0.021 |
| PI226910 | 1.00 | 4.00 | 0.00 | 0.064 |
| PI417634 | 1.00 | 4.00 | 0.00 | 0.080 |

---

TABLE S2. Data from all the materials (wild, cultivated and breeding lines) included in the study.

| Genotype/RIL | Average number of whorls | Average number of roots | Standard deviation for number of roots | Average seed weight (g) |
|--------------|--------------------------|-------------------------|----------------------------------------|-------------------------|
| 37           | 3.2                      | 11.60                   | 0.89                                   | 0.39                    |
| 74           | 3.2                      | 10.80                   | 0.45                                   | 0.21                    |
| 51           | 3.2                      | 10.20                   | 1.48                                   | 0.25                    |
| 6            | 3                        | 11.80                   | 0.45                                   | 0.24                    |
| 62           | 3                        | 11.80                   | 1.30                                   | 0.24                    |
| 4            | 3                        | 11.40                   | 0.55                                   | 0.25                    |
| G19833       | 3                        | 10.80                   | 0.45                                   | 0.39                    |
| 10           | 3                        | 10.67                   | 1.53                                   | 0.30                    |
| 2            | 3                        | 9.60                    | 0.55                                   | 0.40                    |
| 9            | 2.8                      | 10.80                   | 1.79                                   | 0.27                    |
| 34           | 2.8                      | 10.60                   | 1.67                                   | 0.30                    |
| 19           | 2.8                      | 9.20                    | 1.10                                   | 0.29                    |
| 21           | 2.6                      | 9.60                    | 1.67                                   | 0.23                    |
| 69           | 2.4                      | 9.40                    | 1.52                                   | 0.25                    |
| 63           | 2.4                      | 9.20                    | 1.64                                   | 0.29                    |
| 20           | 2.4                      | 8.40                    | 0.55                                   | 0.31                    |
| 16           | 2.2                      | 8.80                    | 1.30                                   | 0.32                    |
| 86           | 2.2                      | 8.60                    | 1.34                                   | 0.30                    |
| 23           | 2.2                      | 8.40                    | 0.89                                   | 0.31                    |
| 25           | 2.2                      | 8.40                    | 0.89                                   | 0.27                    |
| 57           | 2.2                      | 8.20                    | 0.45                                   | 0.33                    |
| 28           | 2.2                      | 8.00                    | 0.00                                   | 0.19                    |
| 27           | 2                        | 8.40                    | 0.89                                   | 0.21                    |
| 36           | 2                        | 8.40                    | 0.89                                   | 0.18                    |

|    |   |      |      |      |
|----|---|------|------|------|
| 29 | 2 | 8.20 | 0.45 | 0.39 |
| 3  | 2 | 8.00 | 0.00 | 0.29 |
| 5  | 2 | 8.00 | 0.00 | 0.36 |
| 8  | 2 | 8.00 | 0.00 | 0.20 |
| 11 | 2 | 8.00 | 0.00 | 0.38 |
| 12 | 2 | 8.00 | 0.00 | 0.22 |
| 13 | 2 | 8.00 | 0.00 | 0.27 |
| 14 | 2 | 8.00 | 0.00 | 0.23 |
| 15 | 2 | 8.00 | 0.00 | 0.24 |
| 17 | 2 | 8.00 | 0.00 | 0.26 |
| 18 | 2 | 8.00 | 0.00 | 0.21 |
| 22 | 2 | 8.00 | 0.00 | 0.31 |
| 24 | 2 | 8.00 | 0.00 | 0.32 |
| 26 | 2 | 8.00 | 0.00 | 0.32 |
| 30 | 2 | 8.00 | 0.00 | 0.24 |
| 31 | 2 | 8.00 | 0.00 | 0.28 |
| 32 | 2 | 8.00 | 0.00 | 0.25 |
| 33 | 2 | 8.00 | 0.00 | 0.29 |
| 35 | 2 | 8.00 | 0.00 | 0.37 |
| 38 | 2 | 8.00 | 0.00 | 0.24 |
| 39 | 2 | 8.00 | 0.00 | 0.24 |
| 40 | 2 | 8.00 | 0.00 | 0.28 |
| 45 | 2 | 8.00 | 0.00 | 0.24 |
| 46 | 2 | 8.00 | 0.00 | 0.22 |
| 47 | 2 | 8.00 | 0.00 | 0.28 |
| 48 | 2 | 8.00 | 0.00 | 0.37 |
| 49 | 2 | 8.00 | 0.00 | 0.24 |

|    |   |      |      |      |
|----|---|------|------|------|
| 50 | 2 | 8.00 | 0.00 | 0.29 |
| 52 | 2 | 8.00 | 0.00 | 0.24 |
| 53 | 2 | 8.00 | 0.00 | 0.25 |
| 54 | 2 | 8.00 | 0.00 | 0.31 |
| 55 | 2 | 8.00 | 0.00 | 0.29 |
| 56 | 2 | 8.00 | 0.00 | 0.30 |
| 58 | 2 | 8.00 | 0.00 | 0.29 |
| 59 | 2 | 8.00 | 0.00 | 0.29 |
| 60 | 2 | 8.00 | 0.00 | 0.29 |
| 61 | 2 | 8.00 | 0.00 | 0.22 |
| 64 | 2 | 8.00 | 0.00 | 0.19 |
| 65 | 2 | 8.00 | 0.00 | 0.19 |
| 66 | 2 | 8.00 | 0.00 | 0.25 |
| 67 | 2 | 8.00 | 0.00 | 0.32 |
| 68 | 2 | 8.00 | 0.00 | 0.21 |
| 70 | 2 | 8.00 | 0.00 | 0.35 |
| 71 | 2 | 8.00 | 0.00 | 0.17 |
| 72 | 2 | 8.00 | 0.00 | 0.26 |
| 73 | 2 | 8.00 | 0.00 | 0.28 |
| 75 | 2 | 8.00 | 0.00 | 0.34 |
| 76 | 2 | 8.00 | 0.00 | 0.22 |
| 81 | 2 | 8.00 | 0.00 | 0.33 |
| 82 | 2 | 8.00 | 0.00 | 0.21 |
| 83 | 2 | 8.00 | 0.00 | 0.19 |
| 84 | 2 | 8.00 | 0.00 | 0.23 |
| 85 | 2 | 8.00 | 0.00 | 0.32 |
| 87 | 2 | 8.00 | 0.00 | 0.28 |

|        |      |       |      |      |
|--------|------|-------|------|------|
| 88     | 2    | 8.00  | 0.00 | 0.28 |
| 89     | 2    | 8.00  | 0.00 | 0.29 |
| DOR364 | 2    | 8.00  | 0.00 | 0.23 |
| 22     | 3.00 | 12.00 | 0.00 | 0.43 |
| 41     | 3.00 | 12.00 | 0.00 | 0.39 |
| G19839 | 3.00 | 11.50 | 1.00 | 0.38 |
| 39     | 3.00 | 11.40 | 0.89 | 0.32 |
| 24     | 3.00 | 10.60 | 1.14 | 0.41 |
| 80     | 3.00 | 10.40 | 0.58 | 0.40 |
| 26     | 2.80 | 9.80  | 1.64 | 0.53 |
| 25     | 2.80 | 9.20  | 0.84 | 0.34 |
| 30     | 2.67 | 10.67 | 2.31 | 0.41 |
| 67     | 2.60 | 10.00 | 2.00 | 0.36 |
| 32     | 2.60 | 9.80  | 1.64 | 0.40 |
| 43     | 2.60 | 9.40  | 0.58 | 0.39 |
| 82     | 2.40 | 8.80  | 1.10 | 0.44 |
| 31     | 2.33 | 8.67  | 1.15 | 0.34 |
| 28     | 2.20 | 8.40  | 0.89 | 0.38 |
| G23333 | 2.00 | 8.00  | 0.00 | 0.27 |
| 3      | 2.00 | 8.00  | 0.00 | 0.27 |
| 4      | 2.00 | 8.00  | 0.00 | 0.50 |
| 5      | 2.00 | 8.00  | 0.00 | 0.45 |
| 7      | 2.00 | 8.00  | 0.00 | 0.31 |
| 8      | 2.00 | 8.00  | 0.00 | 0.31 |
| 9      | 2.00 | 8.00  | 0.00 | 0.33 |
| 10     | 2.00 | 8.00  | 0.00 | 0.40 |
| 11     | 2.00 | 8.00  | 0.00 | 0.37 |

|    |      |      |      |      |
|----|------|------|------|------|
| 12 | 2.00 | 8.00 | 0.00 | 0.34 |
| 14 | 2.00 | 8.00 | 0.00 | 0.28 |
| 15 | 2.00 | 8.00 | 0.00 | 0.30 |
| 16 | 2.00 | 8.00 | 0.00 | 0.33 |
| 18 | 2.00 | 8.00 | 0.00 | 0.40 |
| 21 | 2.00 | 8.00 | 0.00 | 0.31 |
| 23 | 2.00 | 8.00 | 0.00 | 0.34 |
| 32 | 2.00 | 8.00 | 0.00 | 0.37 |
| 37 | 2.00 | 8.00 | 0.00 | 0.40 |
| 38 | 2.00 | 8.00 | 0.00 | 0.42 |
| 40 | 2.00 | 8.00 | 0.00 | 0.37 |
| 42 | 2.00 | 8.00 | 0.00 | 0.33 |
| 44 | 2.00 | 8.00 | 0.00 | 0.26 |
| 45 | 2.00 | 8.00 | 0.00 | 0.43 |
| 49 | 2.00 | 8.00 | 0.00 | 0.31 |
| 51 | 2.00 | 8.00 | 0.00 | 0.44 |
| 52 | 2.00 | 8.00 | 0.00 | 0.36 |
| 55 | 2.00 | 8.00 | 0.00 | 0.33 |
| 56 | 2.00 | 8.00 | 0.00 | 0.33 |
| 59 | 2.00 | 8.00 | 0.00 | 0.35 |
| 60 | 2.00 | 8.00 | 0.00 | 0.37 |
| 63 | 2.00 | 8.00 | 0.00 | 0.35 |
| 64 | 2.00 | 8.00 | 0.00 | 0.30 |
| 65 | 2.00 | 8.00 | 0.00 | 0.30 |
| 66 | 2.00 | 8.00 | 0.00 | 0.49 |
| 68 | 2.00 | 8.00 | 0.00 | 0.26 |
| 69 | 2.00 | 8.00 | 0.00 | 0.26 |



|         |      |       |      |      |
|---------|------|-------|------|------|
| 70      | 2.00 | 8.00  | 0.00 | 0.37 |
| 73      | 2.00 | 8.00  | 0.00 | 0.48 |
| 74      | 2.00 | 8.00  | 0.00 | 0.38 |
| 75      | 2.00 | 8.00  | 0.00 | 0.36 |
| 76      | 2.00 | 8.00  | 0.00 | 0.31 |
| 77      | 2.00 | 8.00  | 0.00 | 0.31 |
| 78      | 2.00 | 8.00  | 0.00 | 0.28 |
| 83      | 2.00 | 8.00  | 0.00 | 0.43 |
| 85      | 2.00 | 8.00  | 0.00 | 0.38 |
| 86      | 2.00 | 8.00  | 0.00 | 0.28 |
| 27      | 2.00 | 8.00  | 0.00 | 0.46 |
| G4494   | 3.20 | 12.00 | 2.55 | 0.58 |
| CAL125  | 3.00 | 12.00 | 0.00 | 0.4  |
| G14655  | 3.00 | 11.20 | 1.79 | 0.49 |
| CERINZA | 3.00 | 11.00 | 0.71 | 0.52 |
| CAL149  | 3.00 | 10.20 | 0.84 | 0.53 |
| ZPV292  | 3.00 | 9.60  | 0.89 | 0.36 |
| TLP19   | 2.80 | 10.40 | 1.52 | 0.24 |
| G19842  | 2.60 | 9.80  | 1.79 | 0.42 |
| CRF61   | 2.60 | 9.20  | 1.30 | 0.24 |
| MAR*1   | 2.60 | 9.00  | 1.00 | 0.25 |
| AND696  | 2.20 | 8.60  | 1.34 | 0.45 |
| VAX1    | 2.20 | 8.40  | 0.89 | 0.22 |
| BF 29   | 2.00 | 8.00  | 0.00 | 0.23 |
| BF19    | 2.00 | 8.00  | 0.00 | 0.24 |
| DICTA17 | 2.00 | 8.00  | 0.00 | 0.32 |
| BF54    | 2.00 | 8.00  | 0.00 | 0.27 |

|          |      |      |      |      |
|----------|------|------|------|------|
| TLP35    | 2.00 | 8.00 | 0.00 | 0.23 |
| BF49     | 2.00 | 8.00 | 0.00 | 0.24 |
| MD2324   | 2.00 | 8.00 | 0.00 | 0.23 |
| VAX6     | 2.00 | 8.00 | 0.00 | 0.19 |
| BAT881   | 2.00 | 8.00 | 0.00 | 0.17 |
| SEA5     | 2.00 | 8.00 | 0.00 | 0.23 |
| RAB651   | 2.00 | 8.00 | 0.00 | 0.2  |
| BAT477   | 2.00 | 8.00 | 0.00 | 0.17 |
| A774     | 2.00 | 8.00 | 0.00 | 0.41 |
| G4825    | 2.00 | 8.00 | 0.00 | 0.22 |
| G19227A  | 2.00 | 8.00 | 0.00 | 0.22 |
| AFR475   | 2.00 | 8.00 | 0.00 | 0.2  |
| SEQ7     | 2.00 | 8.00 | 0.00 | 0.27 |
| AND774   | 2.00 | 8.00 | 0.00 | 0.41 |
| MAM38    | 2.00 | 8.00 | 0.00 | 0.28 |
| RAB655   | 2.00 | 8.00 | 0.00 | 0.26 |
| G3513    | 2.00 | 8.00 | 0.00 | 0.23 |
| G21212   | 2.00 | 8.00 | 0.00 | 0.23 |
| PI417680 | 2.00 | 8.00 | 0.00 | 0.12 |
| PI417644 | 2.00 | 5.80 | 1.10 | 0.09 |
| PI325687 | 1.00 | 4.00 | 0.00 | 0.02 |
| PI430217 | 2.00 | 8.00 | 0.00 | 0.09 |
| PI417692 | 2.00 | 8.00 | 0.00 | 0.11 |
| PI417680 | 2.00 | 8.00 | 0.00 | 0.12 |
| PI430217 | 2.00 | 8.00 | 0.00 | 0.09 |
| PI417692 | 2.00 | 8.00 | 0.00 | 0.11 |
| PI346956 | 2.00 | 8.00 | 0.00 | 0.05 |

|          |      |       |      |      |
|----------|------|-------|------|------|
| PI417695 | 2.00 | 8.00  | 0.00 | 0.13 |
| PI417710 | 2.00 | 8.00  | 0.00 | 0.02 |
| PI533383 | 2.00 | 8.00  | 0.00 | 0.09 |
| PI535403 | 2.00 | 8.00  | 0.00 | 0.09 |
| PI417659 | 2.00 | 6.60  | 1.34 | 0.05 |
| PI417704 | 2.00 | 6.40  | 1.14 | 0.13 |
| PI417644 | 2.00 | 5.80  | 1.10 | 0.09 |
| PI417699 | 1.80 | 7.20  | 1.79 | 0.16 |
| PI417771 | 1.80 | 6.80  | 1.79 | 0.06 |
| PI318697 | 1.80 | 5.60  | 0.89 | 0.04 |
| PI417644 | 1.60 | 5.20  | 1.30 | 0.07 |
| PI417782 | 1.40 | 4.40  | 0.55 | 0.05 |
| PI325687 | 1.00 | 4.00  | 0.00 | 0.02 |
| PI226910 | 1.00 | 4.00  | 0.00 | 0.06 |
| PI417634 | 1.00 | 4.00  | 0.00 | 0.08 |
| G25954   | 3.25 | 13.75 | 4.35 | 0.30 |
| G25798   | 3.00 | 12.00 | 0.00 | 0.44 |
| G35341   | 3.00 | 11.80 | 1.48 | 1.04 |
| G35372   | 3.00 | 11.60 | 0.55 | 0.60 |
| G40142   | 3.00 | 11.00 | 2.83 | 0.16 |
| carioca  | 2.40 | 8.80  | 1.10 | 0.16 |
| G35877   | 2.20 | 8.40  | 0.89 | 0.22 |
| G25914   | 2.00 | 8.25  | 0.50 | 0.14 |
| G40151   | 2.00 | 8.00  | 0.00 | 0.17 |
| G40148   | 2.00 | 8.00  | 0.00 | 0.15 |
| W617479  | 2.00 | 8.00  | 0.00 | 0.23 |
| W617480  | 2.00 | 6.80  | 0.82 | 0.23 |

|           |      |      |      |      |
|-----------|------|------|------|------|
| G25704    | 1.20 | 4.40 | 0.89 | 0.12 |
| G40054    | 1.00 | 4.00 | 0.00 | 0.02 |
| PI1535294 | 0.00 | 0.00 | 0.00 | 0.01 |
| PI1535304 | 0.00 | 0.00 | 0.00 | 0.01 |
| PI1535303 | 0.00 | 0.00 | 0.00 | 0.01 |
| PI535300  | 0.00 | 0.00 | 0.00 | 0.01 |
| P26168    | 0.00 | 0.00 | 0.00 | 0.01 |

---
